# Supplementary material for: HDAC4 integrates PTH and sympathetic signaling in osteoblasts
Source: PubMed Central journal article supplement — J Cell Biol. 2014 Jun 23;205(6):771–80. doi: 10.1083/jcb.201403138 (PMC4068141; doi:10.1083/jcb.201403138), 2014-06-23
Supplement: supp_jcb.201403138_JCB_201403138_sm.pdf [file supp_jcb.201403138_JCB_201403138_sm.pdf]

Obri et al., <http://www.jcb.org/cgi/content/full/jcb.201403138/DC1>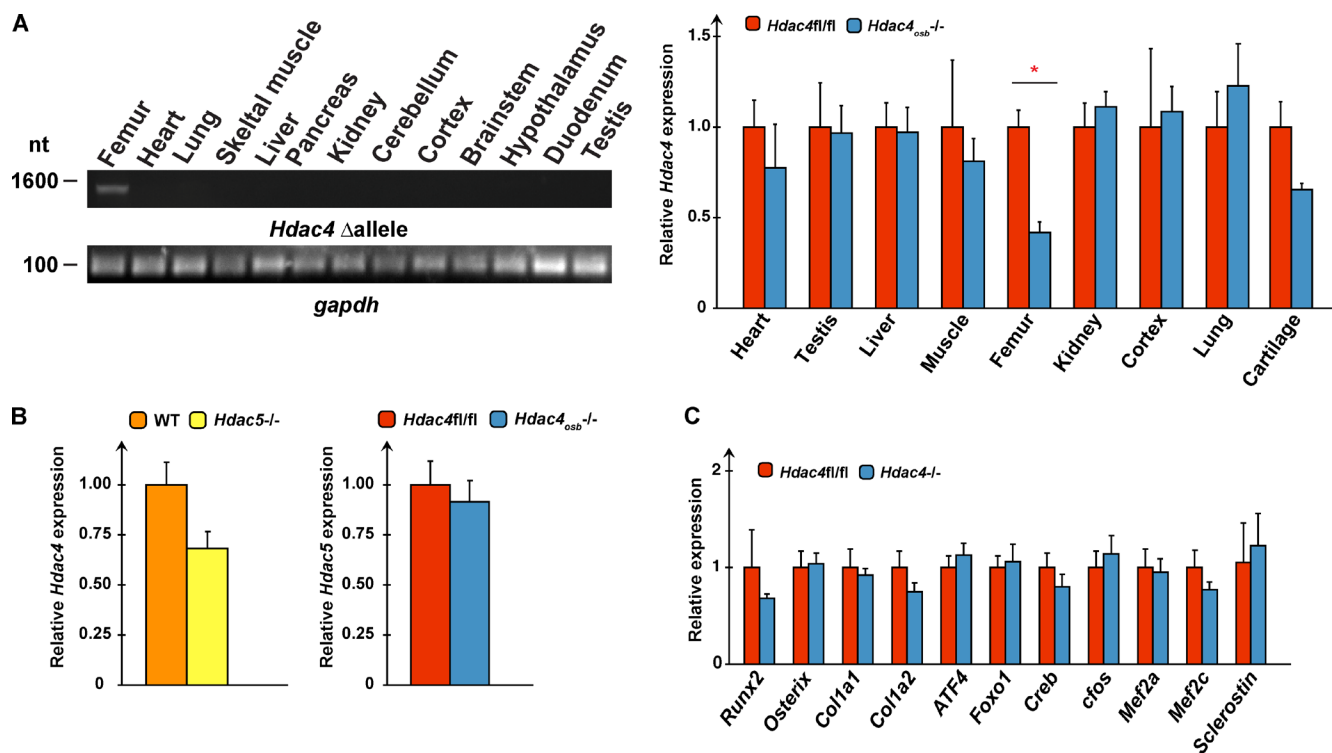

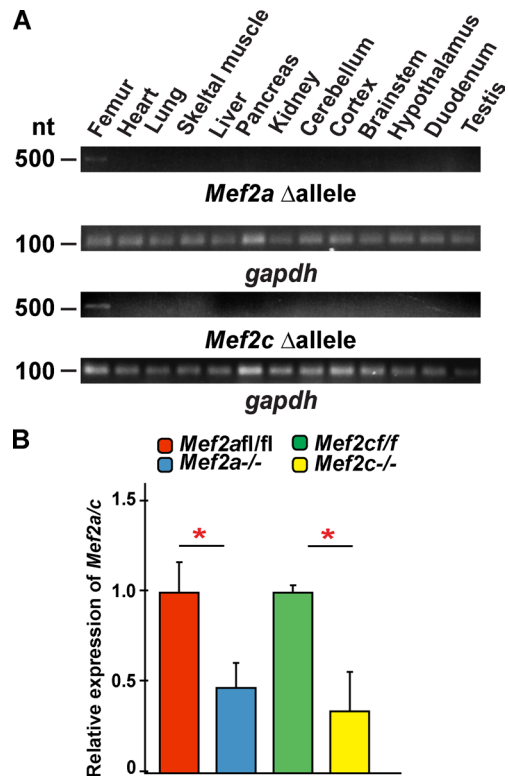

Figure S2. **Osteoblast-specific deletion of *Mef2a* and *Mef2c*.** (A) Detection of the mutated allele of *Mef2a* or *Mef2c* by PCR in genomic DNA isolated from tissues of *Mef2a*<sup>osb</sup><sup>-/-</sup> or *Mef2c*<sup>osb</sup><sup>-/-</sup> mice. PCR for *gapdh* was used as a loading control. (B) Analysis of the deletion efficiency of the *Mef2a* or *Mef2c* alleles, respectively, with the *Runx2-cre* transgene in *Mef2a*<sup>osb</sup><sup>-/-</sup> ( $n = 4$ ) or *Mef2c*<sup>osb</sup><sup>-/-</sup> ( $n = 5$ ) bone marrow osteoblasts. Results are given as means  $\pm$  SEM. \*,  $P < 0.05$  by Student's  $t$  test.

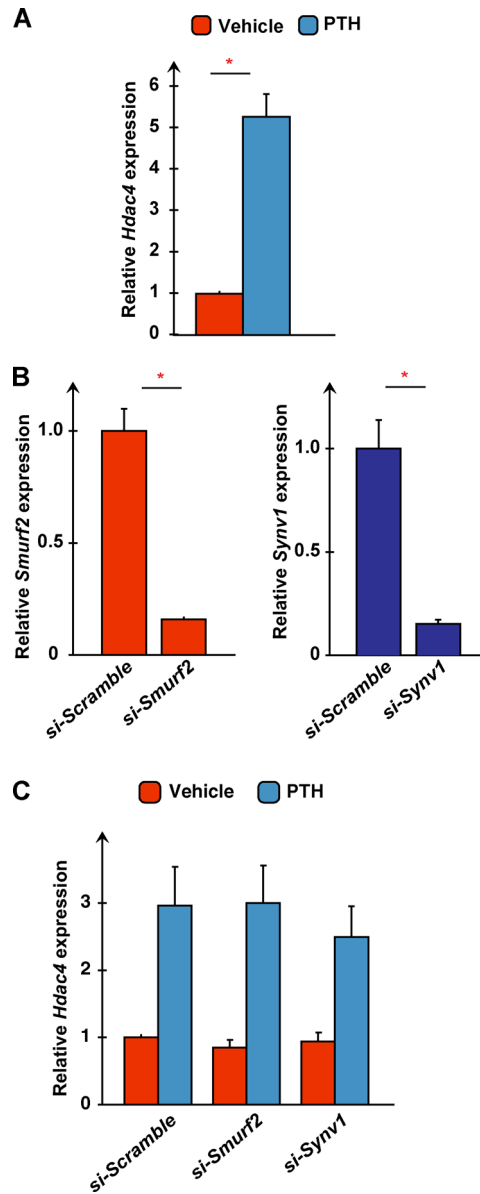

Figure S3. **PTH regulation of *Hdac4* expression is independent of *Smurf2* or *Synv1* inactivation.** (A) Analysis of the expression of *Hdac4* in vehicle- or 10 nM PTH-treated WT osteoblasts for 2 h. Results are represented as a fold change compared with vehicle-treated WT osteoblasts. (B) Analysis of the expression of *Smurf2* and *Synv1* in primary osteoblasts transfected with either *Smurf2* (left) or *Synv1* (right) siRNA. Results are represented as a fold change compared with levels in scrambled siRNA-transfected cells. (C) Analysis of *Hdac4* expression in scrambled-, *Smurf2*-, or *Synv1* siRNA-transfected osteoblasts treated with vehicle or 10 nM PTH for 2 h. Results are represented as fold changes compared with levels seen in vehicle-treated scrambled siRNA-transfected cells. Results are given as means  $\pm$  SEM. \*,  $P < 0.05$  by Student's *t* test.

Table S1. **Primers used in this study**

| Gene name         | Primers                                                         |
|-------------------|-----------------------------------------------------------------|
| <i>Hdac9</i>      | 5'-CGCCACCGACCCCTGAATCG-3' and 5'-GCCAGCGTGCTCTGAGGCAA-3'       |
| <i>Hdac7</i>      | 5'-TTCCTTCCATTGTATCCTACCCGG-3' and 5'-CAGAGCGACTGTGAGACGGCGA-3' |
| <i>Hdac5</i>      | 5'-GTCAAAGGAGCCACGCCAGG-3' and 5'-TTGGGGTGCTGTGGGAGGGAA-3'      |
| <i>Hdac4</i>      | 5'-CCTTGACCAGAGCTCCACCCC-3' and 5'-GGTTGAGGAGGCTGACACCCCA-3'    |
| <i>Rank1</i>      | 5'-AAGATGCGACGTACTTTGGG-3' and 5'-CGTGGGCCATGTCTCTTAGT-3'       |
| <i>Opg</i>        | 5'-GAAAGACCTGCAAATCGAGC-3' and 5'-TTGTGAAGCTGTGCAGGAAC-3'       |
| <i>Mef2a</i>      | 5'-AGTACCGGCAGTGCAAGTGGGA-3' and 5'-CCTGGTGGCGGGGAGACTTT-3'     |
| <i>Mef2b</i>      | 5'-CGCCCGCCTCACTTTCGACC-3' and 5'-GGCTTCTGAGGTGCCCAATCCC-3'     |
| <i>Mef2c</i>      | 5'-GCCGCACGAGAGCCGGACAA-3' and 5'-AGCTGGGAGGTGGAACAGCACAC-3'    |
| <i>Mef2d</i>      | 5'-TTCGCTGTTCCCGTCGGAGC-3' and 5'-GGCTGCTGGGTGGTGATCAGG-3'      |
| <i>Runx2</i>      | 5'-CAGCGTCAACACCATCATT-3' and 5'-CAGACCAGCAGCACTCCATA-3'        |
| <i>Osterix</i>    | 5'-AGCTGCAAGCTCTCTGTAACC-3' and 5'-CCTCTCGACCCGACTGCAGAT-3'     |
| <i>Col1a1</i>     | 5'-TGTTCACTTTGTGGACCTC-3' and 5'-TCAAGCATACCTCGGGTTTC-3'        |
| <i>Col1a2</i>     | 5'-GAAGGGGATCTCGGGGTTG-3' and 5'-GGGAATGCCTCTGCGATGAC-3'        |
| <i>Foxo1</i>      | 5'-GCTGCAATGGTATGGTAGGA-3' and 5'-GTCACAGTCCAAGCGCTCAAT-3'      |
| <i>Creb</i>       | 5'-CTGCCTCAGGCGATGTACAAAC-3' and 5'-CTGTTCTTATTAGACGGACC-3'     |
| <i>c-fos</i>      | 5'-ATTTGACTGGAGGTGCCTG-3' and 5'-CACGTTGCTGATGCTCTTAGC-3'       |
| <i>Smurf2</i>     | 5'-GTCAGGTCCCAGCGACATAG-3' and 5'-TAGGCACTCGTGATCATGC-3'        |
| <i>Smurf1</i>     | 5'-ACGACTGGAAGTCCAACACC-3' and 5'-CAGAGCCTGAAGCCTTGA-3'         |
| <i>Btrc</i>       | 5'-CCCCAAGTACATCACCTC-3' and 5'-CAGCTTGTGCCCATTTAGG-3'          |
| <i>Stub1</i>      | 5'-CTTCTACCGGCGGTCCAG-3' and 5'-GAGACCTACCCTGCTCAGACC-3'        |
| <i>Wwp1</i>       | 5'-CCATCAGGGTGGGAACAGAG-3' and 5'-GCTGCCAGGTTGTTTCTG-3'         |
| <i>Wwp2</i>       | 5'-ACCAGTCTTCGAGTGCTTCG-3' and 5'-GCTGGCTCCTGTATCATCCC-3'       |
| <i>Atf4</i>       | 5'-ATGGCGCTTTCACGAAATC-3' and 5'-ACTGGTCAAGGGGTCATCAA-3'        |
| <i>Sclerostin</i> | 5'-AGCCTTCAGGAATGATGCCAC-3' and 5'-TTTGGCGTCATAGGGATGGT-3'      |
| <i>Cbl</i>        | 5'-GCGGTTGTGTCAAACCCAAA-3' and 5'-AAGAGGCTGATAGTCTGCTTAGT-3'    |
| <i>Fbx15</i>      | 5'-GCCCCTGGAATCTGTGGAC-3' and 5'-GGAGGGGAGCAAGAACCAG-3'         |
| <i>Rbx1</i>       | 5'-GCGGCGATGTGGATA-3' and 5'-GTTGGCCTGACATTCGATACA-3'           |
| <i>Ich</i>        | 5'-TGGGTAGTCTGACCATGAAATCT-3' and 5'-GGGTAACAATAACTGTGAGGG-3'   |
